# Supplementary material for: Generation of cloned transgenic pigs rich in omega-3 fatty acids
Source: Springer Nature journal article supplement (doi:10.1038/nbt1198), 2006-03-26
Supplement: 41587_2006_BFnbt1198_MOESM1_ESM.pdf [file 41587_2006_BFnbt1198_MOESM1_ESM.pdf]

**Supplementary information for Lai et al. “Generation of cloned transgenic pigs rich in omega-3 fatty acids”**

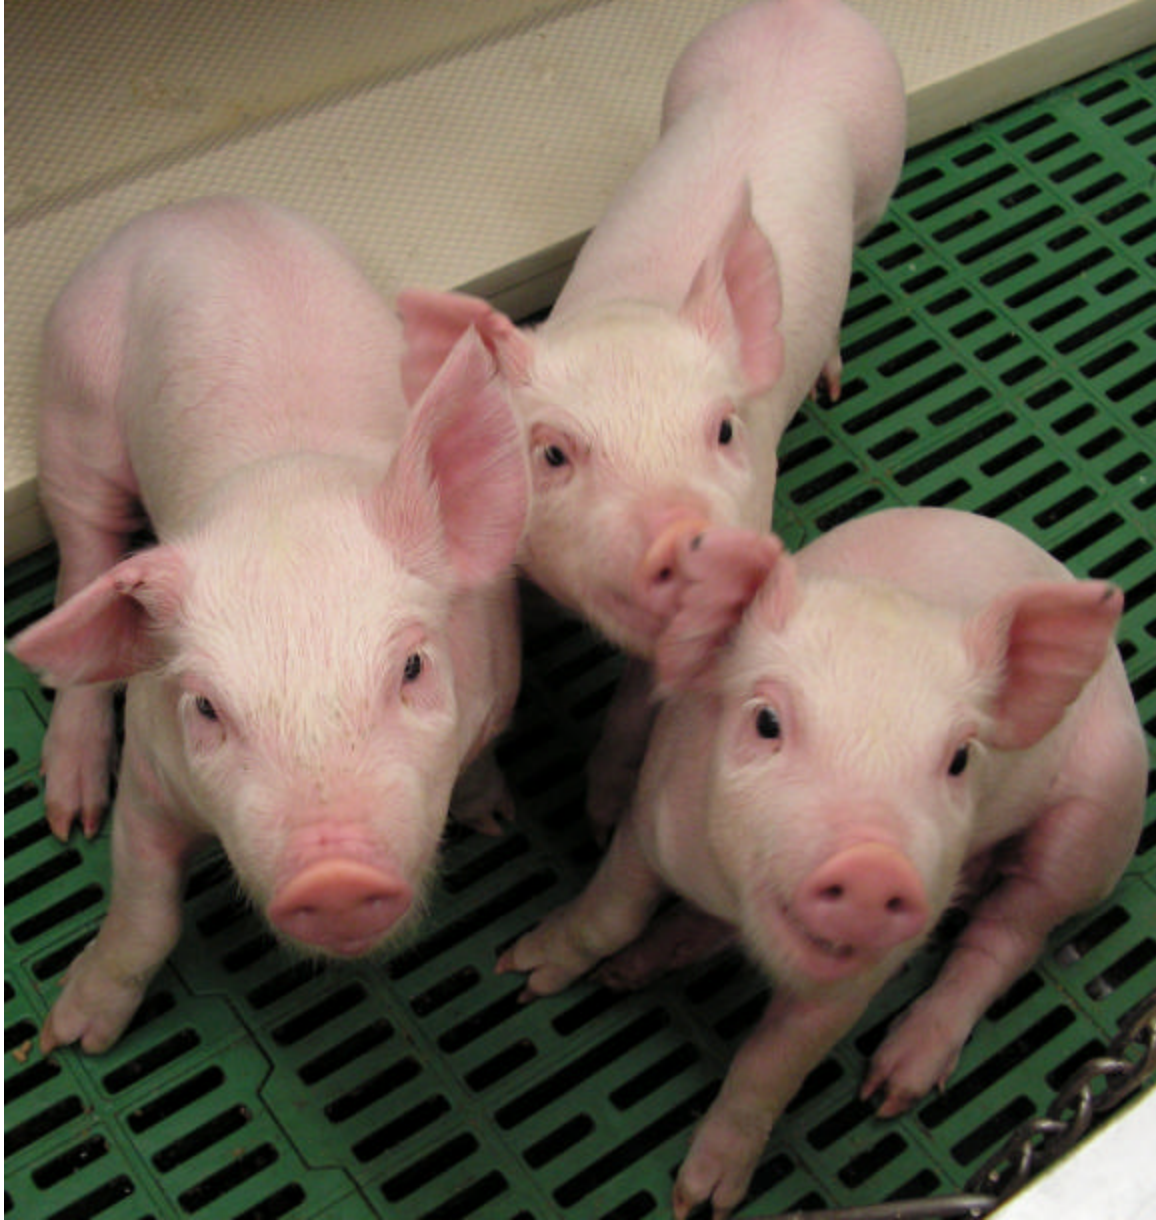

**Supplementary Figure 1.** Photograph of three piglet littermates, *hfat-1* transgenic piglets #8 (middle) and #9 (right) and non-transgenic piglet #10 (left), at age of 3 weeks. They are apparently healthy and no obvious differences in appearance among them were

observed. All the animal work was done following a protocol approved by the University of Missouri-Columbia (Columbia, MO) institutional animal care and use committee.
