# Supplementary material for: Generation of cloned transgenic pigs rich in omega-3 fatty acids
Source: Springer Nature journal article supplement (doi:10.1038/nbt1198), 2006-03-26
Supplement: 41587_2006_BFnbt1198_MOESM2_ESM.pdf [file 41587_2006_BFnbt1198_MOESM2_ESM.pdf]

**Supplementary Table 1. *n*-6/*n*-3 ratios in organs and tissues from piglets #2, #4 and #5**

| Organs or<br>Tissues | <i>n</i> -6/ <i>n</i> -3 Ratio* |                           |                           |
|----------------------|---------------------------------|---------------------------|---------------------------|
|                      | Piglet #2<br>(Non-transgenic)   | Piglet #4<br>(Transgenic) | Piglet #5<br>(Transgenic) |
| Muscle               | 15.88 ± 0.84                    | 4.35 ± 0.00               | 9.02 ± 0.00               |
| Liver                | 9.63 ± 0.16                     | 2.72 ± 0.01               | 4.73 ± 0.03               |
| Kidney               | 17.30 ± 0.34                    | 5.97 ± 0.14               | 10.56 ± 0.34              |
| Heart                | 18.46 ± 0.22                    | 6.68 ± 0.12               | 8.51 ± 0.07               |
| Spleen               | 14.21 ± 0.25                    | 5.03 ± 0.01               | 6.90 ± 0.07               |
| Tongue               | 21.28 ± 0.20                    | 3.61 ± 0.11               | 8.82 ± 0.1                |
| Brain                | 1.56 ± 0.12                     | 1.06 ± 0.01               | 1.07 ± 0.01               |
| Skin                 | 17.39 ± 2.27                    | 9.15 ± 0.17               | 10.77 ± 0.32              |

\* *n*-6/*n*-3 ratio was calculated from *n*-6 fatty acids [linoleic acid (LA, 18:2*n*-6) and arachidonic acid (AA, 20:4*n*-6)] versus *n*-3 fatty acids [ $\alpha$ -linolenic acid (ALA, 18:3*n*-3), eicosapentaenoic acid (EPA, 20:5*n*-3), docosapentaenoic acid (DPA, 22:5*n*-3), and docosahexaenoic acid (DHA, 22:6*n*-3)]. Each value represents the mean ± standard deviation from three independent measurements of each tissue.
