# Supplementary material for: Generation of cloned transgenic pigs rich in omega-3 fatty acids
Source: Springer Nature journal article supplement (doi:10.1038/nbt1198), 2006-03-26
Supplement: nbt1198-S1.pdf [file nbt1198-S1.pdf]

Browse Articles
| Nature Biotechnology


Skip to main content

Thank you for visiting nature.com. You are using a browser version with limited support for CSS. To obtain
the best experience, we recommend you use a more up to date browser (or turn off compatibility mode in
Internet Explorer). In the meantime, to ensure continued support, we are displaying the site without styles
and JavaScript.

Advertisement


- View all journals
- Search
- Log in

- Explore content
- About the journal
- Publish with us

- Sign up for alerts
- RSS feed


1. nature
2. nature biotechnology
3. browse articles

# Browse Articles

## Filter By:

Article Type

All

- All
- Analysis (838)
- Article (1911)
- Business and Regulatory News (612)
- Careers and Recruitment (331)
- Commentary (588)
- Correspondence (1412)
- Dateline (997)
- Editorial (499)
- Erratum (279)
- Feature (378)
- Letter (550)
- News (2103)
- News Analysis (315)
- News & Views (1093)
- News in Brief (349)
- Patents (657)
- Research Article (441)
- Research Paper (510)
- Review Article (284)
- This Month in Biotechnology (328)

Year

All

- All
- 2024 (176)
- 2023 (466)
- 2022 (429)
- 2021 (394)
- 2020 (424)
- 2019 (414)
- 2018 (383)
- 2017 (392)
- 2016 (459)
- 2015 (466)
- 2014 (497)
- 2013 (475)
- 2012 (531)
- 2011 (472)
- 2010 (490)
- 2009 (476)
- 2008 (485)
- 2007 (463)
- 2006 (533)
- 2005 (486)

- ### Analysis and benchmarking of small and large genomic variants across tandem repeats

  A truth-set catalog of human tandem repeats allows benchmarking of variant analysis tools.

  - Adam C. English
  - Egor Dolzhenko
  - Fritz J. Sedlazeck

  Article26 Apr 2024
- ### Author Correction: Adenine transversion editors enable precise, efficient A•T-to-C•G base editing in mammalian cells and embryos

  - Liang Chen
  - Mengjia Hong
  - Dali Li

  Author Correction24 Apr 2024
- ### Author Correction: Re-engineering the adenine deaminase TadA-8e for efficient and specific CRISPR-based cytosine base editing

  - Liang Chen
  - Biyun Zhu
  - Dali Li

  Author Correction24 Apr 2024
- ### Assessing the laboratory performance of AI-generated enzymes

  A set of 20 computational metrics was evaluated to determine whether they could predict the functionality of synthetic enzyme sequences produced by generative protein models, resulting in the development of a computational filter, COMPSS, that increased experimental success rates by 50–150%, tested in over 500 natural and AI-generated enzymes.

  Research Briefing23 Apr 2024
- ### Discovery of tumor-reactive T cell receptors by massively parallel library synthesis and screening

  Tumor-specific T cell receptors (TCRs) are identified by functional screening of synthetic TCR libraries.

  - Ziva Moravec
  - Yue Zhao
  - Wouter Scheper

  Article23 Apr 2024
- ### Therapeutic application of circular RNA aptamers in a mouse model of psoriasis

  A circular RNA aptamer shows therapeutic efficacy in vivo in a psoriasis model.

  - Si-Kun Guo
  - Chu-Xiao Liu
  - Ling-Ling Chen

  Article23 Apr 2024
- ### Computational scoring and experimental evaluation of enzymes generated by neural networks

  Metrics that predict the success of folding and the activity of designed protein sequences are developed and experimentally validated.

  - Sean R. Johnson
  - Xiaozhi Fu
  - Kevin K. Yang

  ArticleOpen Access23 Apr 2024
- ### Why Japan lacks a vibrant biotech industry

  - Mark Kessel
  - Chris Vickrey

  Correspondence22 Apr 2024
- ### Customized molecular glue complexes with desired properties

  - Iris Marchal

  Research Highlight17 Apr 2024
- ### World’s priciest drug treats MLD

  News in Brief17 Apr 2024
- ### Saving Cavendish

  - Claire Turrell

  News17 Apr 2024
- ### Prime editing

  Recent patents relating to methods and compositions for prime editing.

  Patents17 Apr 2024
- ### FDA approves first MASH drug

  News in Brief17 Apr 2024
- ### Biotech news from around the world

  News in Brief17 Apr 2024
- ### First gene-edited pig kidney transplant

  News in Brief17 Apr 2024
- ### RoseTTAFold expands to all-atom for biomolecular prediction and design

  - Iris Marchal

  Research Highlight17 Apr 2024
- ### Mapping the landscape of host–microbiome interactions

  - Iris Marchal

  Research Highlight17 Apr 2024
- ### Prime editing deal flurry to nail down patent rights

  The prime editing field is booming, with companies making strategic decisions to avoid an IP showdown.

  - Carrie Arnold

  News17 Apr 2024
- ### Startups probe hidden viruses in the ‘dark genome’ to treat disease

  Drug hunters are finding that ancient virus-like artifacts in the human genome could offer new avenues to treat neurodegeneration, cancer, autoimmunity and even aging with antibodies, vaccines and antiretroviral agents.

  - Michael Eisenstein

  News17 Apr 2024
- ### Video game unleashes millions of citizen scientists on microbiome research

  Borderlands Science is a casual mini-game released within a mass-market video game that crowdsources the alignment of one million RNA sequences from the human microbiome. In 3 years, 4 million participants generated over 135 million puzzle solutions that were used to build a reference alignment and improve microbial phylogeny.

  Research Briefing17 Apr 2024

- Previous page
- page 1
- page 2
- page 3
- …
- page 954
- Next page

## Explore content

- Research articles
- Reviews & Analysis
- News & Comment
- Podcasts
- Videos
- Current issue
- Collections

- Follow us on Facebook
- Follow us on Twitter
- Sign up for alerts
- RSS feed


## About the journal

- Aims & Scope
- Journal Information
- Journal Metrics
- About the Editors
- Our publishing models
- Editorial Values Statement
- Editorial Policies
- Content Types
- Web Feeds
- Posters
- Contact
- Research Cross-Journal Editorial Team
- Reviews Cross-Journal Editorial Team


## Publish with us

- Submission Guidelines
- For Reviewers
- Language editing services
- Submit manuscript

## Search

Search articles by subject, keyword or author

Show results from

All journals
This journal

Search

Advanced search

### Quick links

- Explore articles by subject
- Find a job
- Guide to authors
- Editorial policies

Nature Biotechnology (*Nat Biotechnol*)

ISSN 1546-1696 (online)

ISSN 1087-0156 (print)

## nature.com sitemap

### About Nature Portfolio

- About us
- Press releases
- Press office
- Contact us

### Discover content

- Journals A-Z
- Articles by subject
- protocols.io
- Nature Index

### Publishing policies

- Nature portfolio policies
- Open access

### Author & Researcher services

- Reprints & permissions
- Research data
- Language editing
- Scientific editing
- Nature Masterclasses
- Research Solutions

### Libraries & institutions

- Librarian service & tools
- Librarian portal
- Open research
- Recommend to library

### Advertising & partnerships

- Advertising
- Partnerships & Services
- Media kits
- Branded
  content

### Professional development

- Nature Careers
- Nature 
  Conferences

### Regional websites

- Nature Africa
- Nature China
- Nature India
- Nature Italy
- Nature Japan
- Nature Middle East

- Privacy
  Policy
- Use
  of cookies
- Your privacy choices/Manage cookies
- Legal
  notice
- Accessibility
  statement
- Terms & Conditions
- Your US state privacy rights

© 2024 Springer Nature Limited

xml version="1.0" encoding="UTF-8"?
